# Supplementary material for: 6,7,4′-Trihydroxyflavanone Mitigates Methamphetamine-Induced Neurotoxicity in SH-SY5y Cells via Nrf2/heme Oxyganase-1 and PI3K/Akt/mTOR Signaling Pathways
Source: MDPI journal article supplement (doi:10.3390/molecules26092442), 2021-04-22

Figure S1. Exposure to METH leads to neurotoxicity in dose-dependent manner.

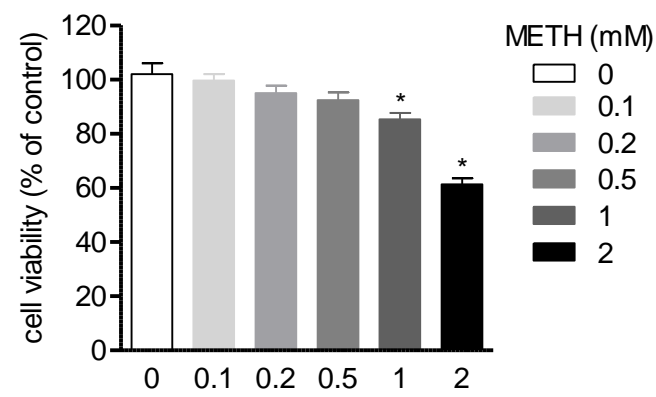

Figure 3A

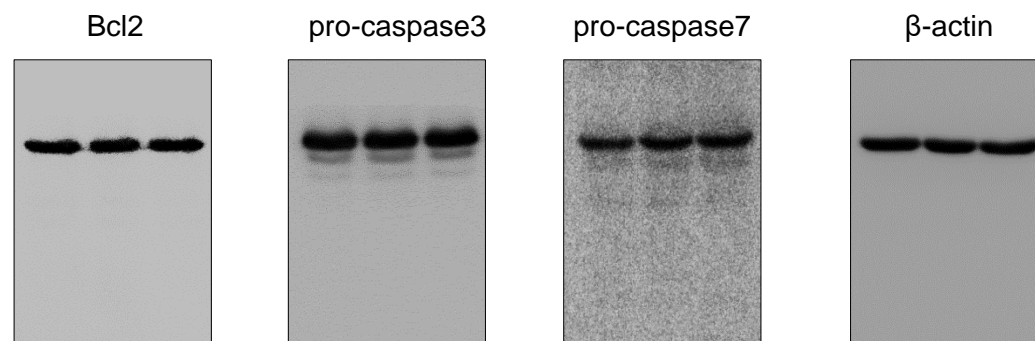

Figure 3C

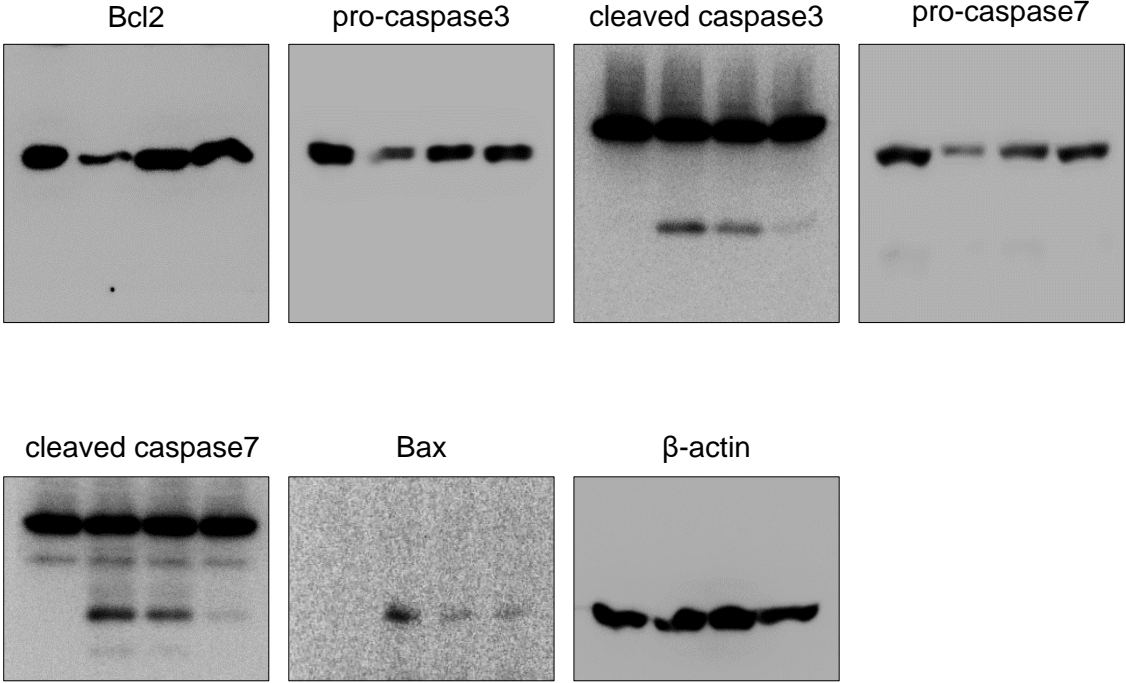

Figure 4C

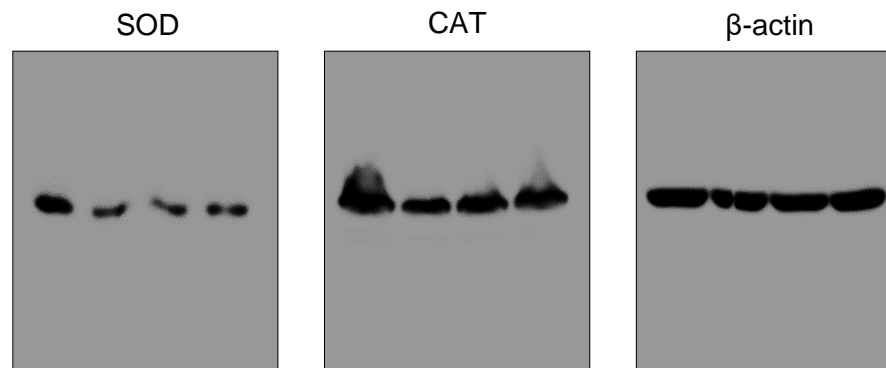

Figure 5A

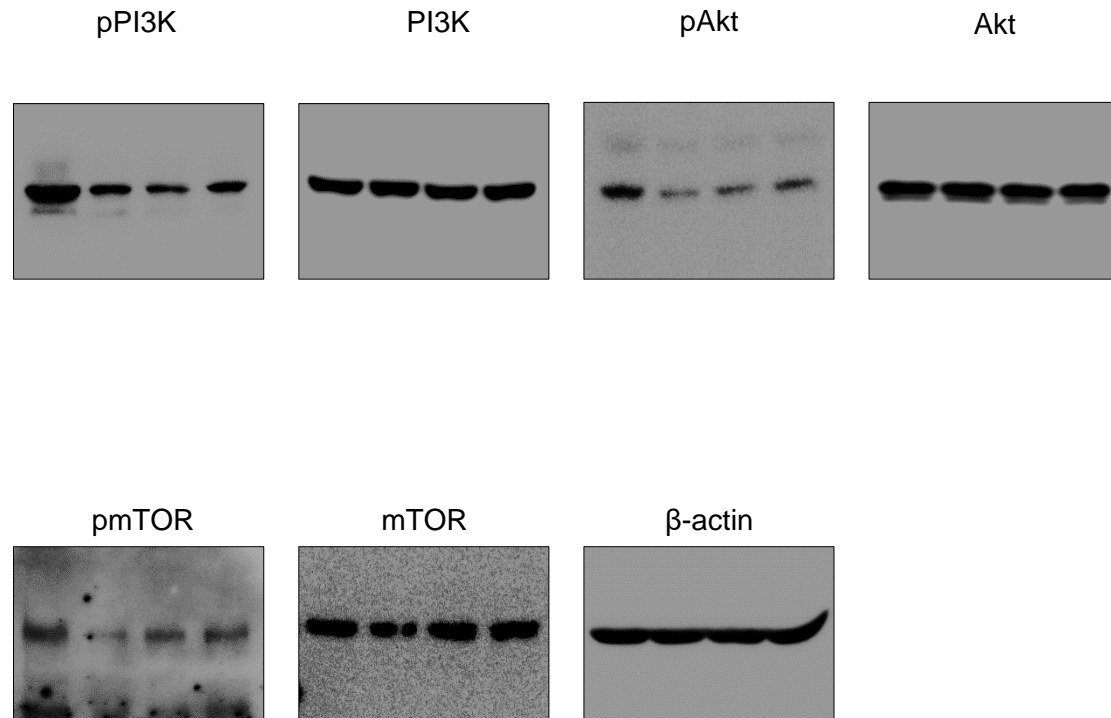

Figure 5C

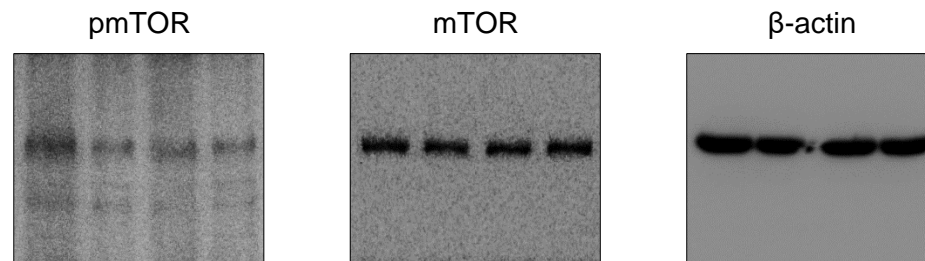

Figure 6A

Nrf2

LaminB

$\beta$ -actin

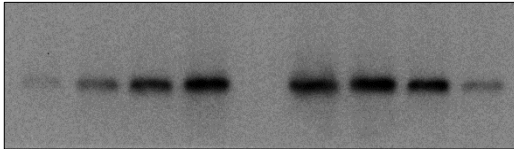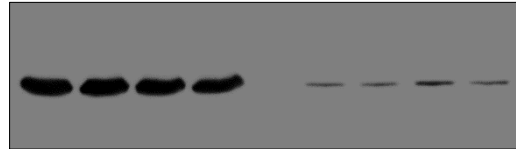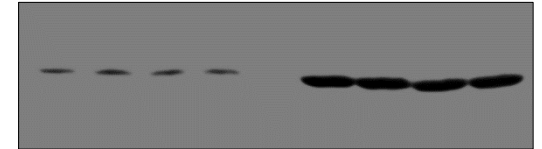

Figure 6B

Nrf2

LaminB

$\beta$ -actin

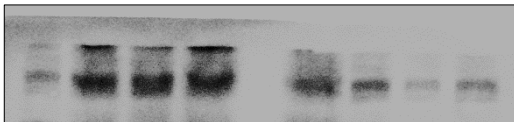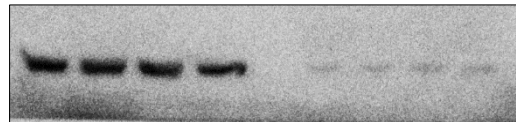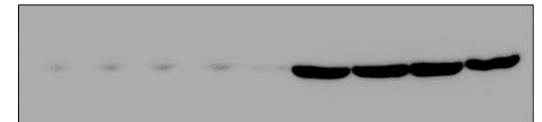

Figure 8A

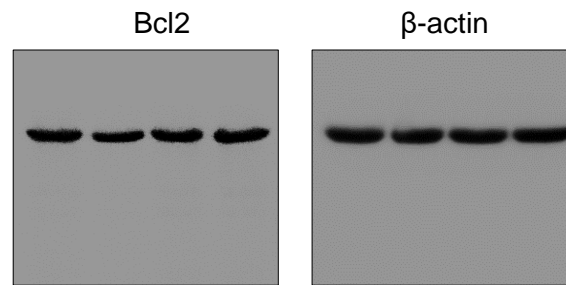

Supplement: s1 [file s1]
